# Supplementary material for: SFPFusion: An Improved Vision Transformer Combining Super Feature Attention and Wavelet-Guided Pooling for Infrared and Visible Images Fusion
Source: MDPI journal article supplement (doi:10.3390/s23187870), 2023-09-13
Supplement: s1 [file s1]

## Article

# SFPFusion: An Improved Vision Transformer Combining Super Feature Attention and Wavelet-Guided Pooling for Infrared and Visible Images Fusion

Hui Li <sup>\*,†</sup>, Yongbiao Xiao <sup>†</sup>, Chunyang Cheng and Xiaoning Song

International Joint Laboratory on Artificial Intelligence of Jiangsu Province, School of Artificial Intelligence and Computer Science, Jiangnan University, Wuxi 214122, China; yongbiao\_xiao\_jnu@163.com (Y.X.); chunyang\_cheng@163.com (C.C.); x.song@jiangnan.edu.cn (X.S.)

\* Correspondence: lihui.cv@jiangnan.edu.cn

<sup>†</sup> These authors contributed equally to this work and should be considered co-first authors.

## S1. Super Feature Attention

Therefore, we iteratively run the algorithm, divided into the following steps:

At iteration  $i$ , We extract the  $3 \times 3$  surrounding super features  $\bar{S} \in \mathbb{R}^{mn \times C \times 9}$  corresponding to each token via unroll function. We limit the association computations from each token to only 9 surrounding super features, which speeds up the running process and reduces the amount of computation. Next, we need to compute sparse associations  $Q^i$ . In this work, we apply a strategy similar to attention guidance to compute it and the formula is defined as:

$$Q^i = \text{Softmax} \left( \frac{TS^{i-1T}}{\sqrt{C}} \right) \quad (S1)$$

Where  $C$  is the number of channel.

Moreover, we continuously update  $\bar{S}$  and combine the surrounding tokens to  $S$  via the roll function to prepare for association normalization. To be specific, super features are updated as a weighted sum of tokens, defined as follows:

$$S^i = \left( \text{Norm}(Q^i) \right)^T T \quad (S2)$$

Where  $\text{Norm}(\cdot)$  stands for normalization operation. At this point, we can capture the super features.

Since super features mainly focus on local features of visual content, we need to apply multi-head self-attention (MHSA) to pay more attention to global long-range dependencies. The attention mechanism can be defined as:

$$\text{Attention}(\mathbf{Q}, \mathbf{K}, \mathbf{V}) = \text{softmax} \left( \frac{\mathbf{Q}\mathbf{K}^T}{\sqrt{C}} \right) \mathbf{V} \quad (S3)$$

Our use of multi-head self-attention mechanism can consider different attention distributions, so that the network can obtain meaningful information from different perspectives. We apply the MHSA to the super features  $S \in \mathbb{R}^{C \times m \times n}$ . Thus, the full process of MHSA for  $S$  is formulated as:

$$\begin{aligned} \text{Attention}(S) &= \text{softmax} \left( \frac{\mathbf{Q}(S)\mathbf{K}^T(S)}{\sqrt{C}} \right) \mathbf{V}(S) \\ \text{s.t. } \{\mathbf{Q}, \mathbf{K}, \mathbf{V}\} &= \{S\mathbf{W}^Q, S\mathbf{W}^K, S\mathbf{W}^V\} \end{aligned} \quad (S4)$$

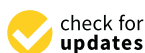

**Citation:** Li, H.; Xiao, Y.; Cheng, C.; Song, X. SFPFusion: An Improved Vision Transformer Combining Super Feature Attention and Wavelet-Guided Pooling for Infrared and Visible Images Fusion. *Sensors* **2023**, *23*, 7870. <https://doi.org/10.3390/s23187870>

Academic Editors: Guanqiu Qi, Yu Liu, Zhiqin Zhu and Huafeng Li

Received: 10 August 2023

Revised: 8 September 2023

Accepted: 11 September 2023

Published: 13 September 2023

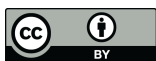

**Copyright:** © 2023 by the authors. Licensee MDPI, Basel, Switzerland. This article is an open access article distributed under the terms and conditions of the Creative Commons Attribution (CC BY) license (<https://creativecommons.org/licenses/by/4.0/>).

Although super feature can capture global features well through multi-head self-attention, it also loses local details in the sampling process. So it is necessary to map super features back to the token space. Specifically, we perform the sparse multiplication of  $Q$  and  $S$  via unroll operation to upsample tokens, which can be formulated as:

$$F_{SF} = \text{Up}(\text{Attention}(S)) = Q \text{ Attention}(S) \quad (\text{S5})$$

Where  $\text{Up}(\cdot)$  represents upsample operation.

## S2. Comparative Experiments

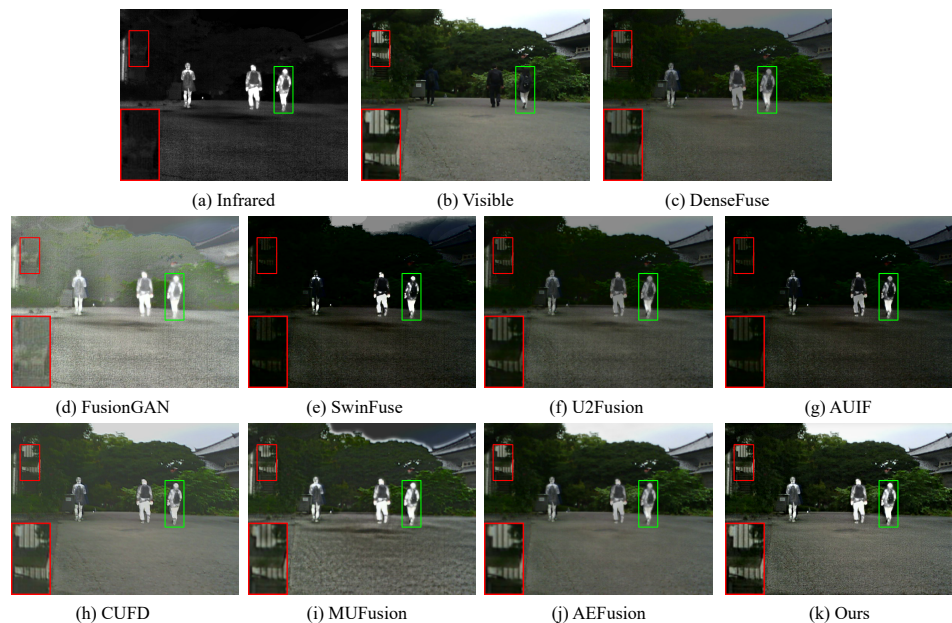

**Figure S1.** Qualitative comparison of our method with 8 state-of-the-art methods on the MSRS dataset.

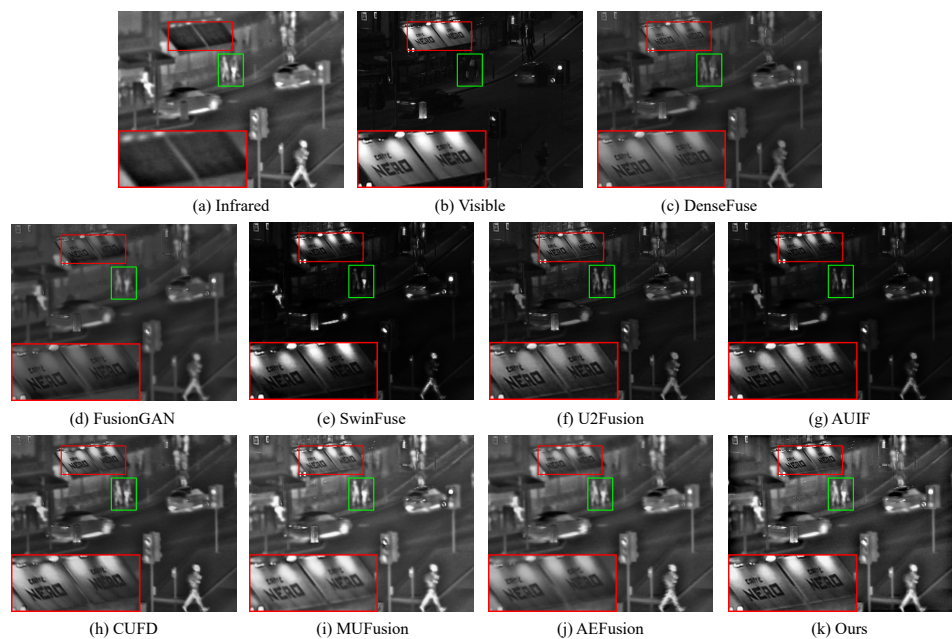

**Figure S2.** Qualitative comparison of our method with 8 state-of-the-art methods on the TNO dataset.
